# Supplementary material for: Evaluation of a Training Intervention for Primary Healthcare Workers to Improve Management of Diabetes and Hypertension in Kisumu County, Kenya: A Mixed-Methods Study
Source: Research Square preprint supplement (doi:10.21203/rs.3.rs-7682531/v1), 2025-10-18
Supplement: Supplementary file 1 [file 2326b7569c8f9286376b95a2.docx]

**Webannex**

# **Webannex I: Tool – Pre and Post-test assessments**

## Pre-Test (Pre-training)

**1. How is NCD management different from communicable diseases?**

a. NCDs need long term care with unique Identification number

b. Lack of symptoms

c. NCDs can be cured with medications

d. Difficulty to adhere to medications

e. Med not available free & often can't be purchased by patients

f. They don't require long term follow up and management

g. Lack of understanding about complications of uncontrolled BP

h. Lack of awareness for checking of complications

**2. How can detection of DM and HTN be improved?**

a. Check BP smoking status and BMI if patient appears to be overweight for all adults coming to the health facility

b. Only check BP and test for diabetes if patients have symptoms

c. Use opportunities like patients coming for treatment with TB HIV antenatal care & other conditions.

d. Use the opportunity to check for BP for all and diabetes whenever indicated

e. No need to screen all adult patients

**3. How can lifestyle modification advice be provided?**

a. While the messages appear simple they are behaviour changes and will take time an effort to achieve. Constant communication without blaming the person and thru a positive messaging can help.

b. Provide advice in a scolding/blaming manner

c. It's not necessary to involve family/caregivers

d. Try to identify a caregiver or family member who can support the person in adhering to lifestyle modification Important thing is “***DON'T BLAME***” the patient .

**4. What changes in system are needed to improve DM and HTN management?**

a. A well-defined service delivery model with clarity on roles and responsibilities

b. More infrastructure like buildings is needed rather than service delivery model

c. Administrative orders or similar approvals from higher authorities are essential to ensure that staff can perform new tasks needed for DM and HTN

d. No changes needed, current system is sufficient

**5. How do we know that the system is improving?**

a. Give the chronic nature of the diseases, regular clinical audits can help to improve the skills and capacity and address challenges in services.

b. It is preferable to have a computer where an Excel based worksheet can be used to enter data from the treatment and follow-up card once a month. The number of patients may not be too many and hence it is manageable to have once a month data entry

c. If number of patients increase it means system is working better

d. Monthly/irregular data entry is enough, no need for consolidated reports

**6. What is the estimated percentage of adults in Kenya that have hypertension?**

A) 10%

B) 24%

C) 35%

D) 50%

**7. Which of the following is NOT a common risk factor for both Diabetes Mellitus (DM) and Hypertension (HTN)?**

A) Tobacco use

B) Physical inactivity

C) High protein diet

D) Unhealthy diets

**8. According to the Kenya Hypertension Management Guidelines, which of the following is a recommended first-line medication?**

A) Beta-blockers

B) Thiazide diuretics

C) Antidepressants

D) Statins

**9. What common misconception about diabetes management is often held by patients?**

A) Diabetes can be managed solely through diet.

B) Insulin is only necessary for type 1 diabetes.

C) All individuals with diabetes will eventually require insulin.

D) Regular exercise can help manage blood sugar levels.

**10. Which of the following statements about the management of Diabetes Mellitus (DM) and Hypertension (HTN) are TRUE? (Select all that apply)**

A) Regular physical activity can help manage both DM and HTN.

B) All patients with diabetes will eventually require insulin therapy.

C) Dietary changes, such as adopting the DASH diet are recommended for managing hypertension.

D) Monitoring blood pressure at home is an effective way to manage hypertension.

E) Screening for NCDs is only necessary for individuals with a family history of these diseases.

**11. Patients with hypertension should be advised to avoid all forms of physical activity to prevent strain on their heart.**

a. True

b. False

**12. Providing written materials about diabetes and hypertension management is unnecessary if verbal instructions are given during counseling sessions.**

a. True

b. False

**13. Providing brief advice using the 5 A's framework during routine patient interactions is an effective counselling approach for behaviour change.**

a. True

b. False

**14. Readiness to change should be assessed before providing advice on risk factor modification.**

a. True

b. False

**15. Hypertensive medicine is addictive or develop dependence**

a. True

b. False

## Post Test (Post-training)

1. **The multidisciplinary team is instrumental in emphasizing the role and importance of Nutrition in the care process and not as a less necessary part of management.**
2. True
3. False
4. **In what ways is the management of non-communicable diseases (NCDs) distinct from the management of communicable diseases?**
   a. NCDs do not require extended follow-up and management.

b. NCDs often have no noticeable symptoms initially.
c. Patients lack awareness regarding the need for regular monitoring of NCD complications.

d. Patients with NCDs face challenges in medication adherence.
e. Medications for NCDs are rarely available for free and may be unaffordable for many.
f. NCDs require continuous care and the use of unique identification for patient tracking.
g. The long-term complications of unmanaged hypertension are poorly understood.
h. NCDs can be entirely cured with medication.

1. **What are effective methods to improve early detection of hypertension and diabetes?**
   a. Measure blood pressure, assess smoking habits, and calculate BMI for all adults attending the health facility.
   b. There's no need to screen all adults—only those showing symptoms.

c. Only check for hypertension and diabetes if the patient presents symptoms.
d. Routinely check blood pressure and screen for diabetes when clinically indicated.
e. Utilize visits for other conditions (TB, HIV, antenatal care) to screen for NCDs.

1. **How should healthcare workers approach lifestyle counseling for NCDs?**
   a. Family or caregivers should not be involved in counseling for lifestyle changes.
   b. Changes in behavior take time, and consistent, positive reinforcement can be helpful.
   c. Harshly reminding patients of their lifestyle choices helps motivate change.
   d. Engaging caregivers or family members can provide valuable support to patients in modifying their lifestyle.
2. **Type 1 Diabetes is a combined insulin resistance and relative deficiency in insulin secretion.**
3. True
4. False
5. **Which systemic improvements can enhance the management of hypertension and diabetes?**
   a. Establish a clear service delivery model with well-defined roles and responsibilities.
   b. Focus more on constructing new facilities rather than improving service delivery models.
   c. Staff need administrative approval from higher authorities before adopting new roles for NCD management.
   d. No changes are needed in the current system—it is sufficient for managing NCDs.
6. **How can health systems monitor improvements in NCD management?**
   a. Regular clinical audits can help address challenges and improve healthcare delivery.
   b. An Excel-based worksheet can be used to track patients monthly from follow-up records.
   c. An increase in patient numbers directly indicates system improvement.
   d. Monthly data entry into a digital system is enough without further consolidated reporting.
7. **What are essential clinical interventions for managing NCDs in primary care settings?**
8. Promotion of healthy behaviors and provision of essential medications.
9. Hospitalization for long-term management.
10. Regular screening and monitoring for risk factors.
11. Implementation of a patient-centered approach to long-term care.
12. Use of risk prediction charts to identify at-risk individuals.
13. Expensive imaging tests at each visit.
14. **What proportion of Kenyan adults are affected by hypertension?**
    a) 10%
    b) 24%
    c) 35%
    d) 50%
15. **Which is not considered a shared risk factor between diabetes and hypertension?**
    a) Smoking
    b) Sedentary lifestyle
    c) High protein intake
    d) Poor dietary habits
16. **Which of the following counselling statements is not from 5 A approach counseling?**
17. It may take sometimes to change the habit of salt intake in your daily life, you may explore other options
18. How often do you add salt in your plate food?
19. Give a TCA to the client
20. For people using 10 grams of table salt, inform them that use of excessive salt can increase chances of getting hypertension
21. Help the person to come of with a plan of salt intake reduction in his daily life
22. I want to know whether you have reduced salt intake
23. Do you ever add salt in your plate before eating?
24. **Which of these medications is considered a first-line treatment for hypertension, according to Kenyan guidelines?**
    a) Beta-blockers
    b) Thiazide diuretics
    c) Antidepressants
    d) Statins
25. **What is a common misconception about managing diabetes?**
    a) Diabetes can be fully managed with diet alone.
    b) Only Type 1 diabetes requires insulin.
    c) All diabetic patients will eventually need insulin.
    d) Regular exercise can improve blood sugar control.
26. **Which of these statements accurately reflects key management strategies for diabetes and hypertension? (Select all that apply)**
    a) Engaging in regular physical activity can help manage both conditions.
    b) All diabetes patients will need insulin at some point.
    c) The DASH diet is recommended for managing hypertension.
    d) Monitoring blood pressure at home can effectively control hypertension.
    e) Screening for NCDs should only be done for individuals with a family history.
27. **True or False: People with hypertension should avoid all physical activity to prevent overworking the heart.**
    a) True
    b) False
28. **True or False: Providing printed materials for diabetes and hypertension management is redundant if patients receive verbal instructions.**
    a) True
    b) False
29. **True or False: Conducting regular brief counseling using the 5 A’s framework (Ask, Advise, Assess, Assist, Arrange) during patient visits helps promote behavior change.**
    a) True
    b) False
30. **True or False: A patient's readiness to change their lifestyle should always be assessed before providing advice on risk factor modification.**
    a) True
    b) False
31. **True or False: Hypertension medications are addictive and lead to dependence over time.**
    a) True
    b) False
32. **What are the key parameters that must be included in an effective NCD service delivery model?**
33. Integration of NCD services into existing health programs.
34. Clear strategies for patient flow, resource utilization, and follow-up management.
35. Separation of NCD services from other programs to avoid complexity
36. Community engagement and awareness.
37. Essential clinical interventions and readiness of facilities.

# **Webannex II: Indices – Knowledge and Practice based on Post-test assessment**

**Supplementary Table 4: Knowledge and Practice Indices**

| **Knowledge related questions** | **Practice related questions** |
| --- | --- |
| **Question 1:** True/False about the role of the multidisciplinary team in nutrition. | **Question 2:** Differences in the management of NCDs and communicable diseases. |
| **Question 5:** True/False about Type 1 Diabetes. | **Question 3:** Methods to improve early detection of hypertension and diabetes. |
| **Question 9:** Proportion of Kenyan adults affected by hypertension. | **Question 4:** Approaches to lifestyle counseling for NCDs. |
| **Question 10:** Shared risk factors between diabetes and hypertension. | **Question 6:** Systemic improvements for managing hypertension and diabetes. |
| **Question 12:** First-line treatment for hypertension according to Kenyan guidelines. | **Question 7:** Monitoring improvements in NCD management. |
| **Question 13:** Common misconception about managing diabetes. | **Question 8:** Essential clinical interventions for managing NCDs in primary care settings. |
| **Question 15:** True/False about physical activity for people with hypertension. | **Question 11:** Counseling statements not from the 5 A approach. |
| **Question 16:** True/False about providing printed materials for diabetes and hypertension management. | **Question 14:** Key management strategies for diabetes and hypertension. |
| **Question 17:** True/False about the 5 A’s framework for counseling. | **Question 20:** Key parameters in an effective NCD service delivery model. |
| **Question 18:** True/False about assessing a patient's readiness to change their lifestyle. |  |
| **Question 19:** True/False about hypertension medications being addictive. |  |

**Supplementary Table 6: Marking Schemes for pre and post test questions**

| **Questions appearing in both Pre and Post test in terms of question number** | | |
| --- | --- | --- |
| **Pre-test** | **Post-test** | **Correct Answers** |
| 1 | 2 | Pre-test- a,b,c,d,e,g,h  Post-test- b,c,d,e,f,g |
| 2 | 3 | Pre-test- a,c,d  post-test- a,d,e |
| 4 | 6 | a,c |
| 5 | 7 | a,b |
| 6 | 9 | b |
| 7 | 10 | c |
| 8 | 12 | b |
| 9 | 13 | c |
| 10 | 14 | a,c,d |
| 11 | 15 | b |
| 12 | 16 | b |
| 13 | 17 | a |
| 14 | 18 | a |
| 15 | 19 | b |
| **Questions appearing only in Pre-test** | | |
| 3 | NA | a,d |
| **Questions appearing only in Post-test (Distractors to control for the learning effect)** | | |
| NA | 1 | a |
| 4 | b,d |
| 5 | b |
| 8 | a,c,d,e, |
| 11 | a,f |
| 20 | a,b,d,e |

# **Webannex III: Tool – Acceptability and Feasibility Assessment**

Adapted from Mandeep Sekhon, Martin Cartwright1 and Jill J. Francis on Development of a theory‑informed questionnaire to assess the acceptability of healthcare interventions. These questions were administered pre-training and retrospectively with minor edits for pre-training questions.

**Supplementary Table 5: Acceptability and Feasibility Assessment**

| **Statement** | **Scale (1-5)** | **Instructions** |
| --- | --- | --- |
| **Training Interventions for PHC Workers** |  | Please indicate your response to each statement using a scale of 1 to 5, where 1 = Low and 5 = High. |
| 1. Did you like or dislike the training provided to healthcare workers in managing diabetes and hypertension? (Affective attitude construct) |  |  |
| 2. How comfortable did you feel participating in healthcare workers' training on hypertension and diabetes management? (Affective attitude construct) |  |  |
| 3. How much effort did it take you to participate in the training of healthcare workers to manage diabetes and hypertension? (Burden construct) |  |  |
| **Moral or Ethical Consequences, Knowledge, and Workload** |  | Please indicate your level of agreement with the following statements using a scale of 1 to 5. |
| 4. There are moral or ethical consequences to participate in the training of healthcare workers on the management of diabetes and hypertension. (Ethicality construct) |  |  |
| 5. Receiving diabetes and hypertension management training makes it more difficult for me to manage other medical conditions in the facility. (Ethicality construct) |  |  |
| 6. Healthcare workers' training has improved my skills, knowledge, and practice in diabetes and hypertension management. (Perceived Effectiveness construct) |  |  |
| 7. It is clear to me how receiving the training in diabetes and hypertension management has helped improve outcomes for patients living with diabetes and/or hypertension. (Intervention coherence construct) |  |  |
| 8. Participating in healthcare workers' diabetes and hypertension management training is fair to all. (Self-efficacy construct) |  |  |
| 9. I now feel confident that after the training I will be able to manage diabetes and hypertension effectively. (Opportunity costs construct) |  |  |
| 10. As a healthcare worker, how acceptable were the trainings on managing diabetes and hypertension to you? (General acceptability construct) |  |  |
| **Additional Comments** |  | Please indicate if you have any additional observations or comments here. |

# **Webannex IV: Tool – PHC Workers FGDs guide**

1. How relevant do you think are the PHC worker’s training interventions for managing DM and HTN in your facility? Can you provide specific examples of how training and guidelines align with the needs of patients in this facility?
2. What potential barriers do you foresee in the implementation of training and national guidelines regarding management of DM and HTN?
3. In your own opinion, do you have adequate resources/capacity and support as a facility to implement these training interventions and national guidelines effectively? What additional resources or support would be necessary?
4. Are you prepared as a provider or facility to implement training interventions? What kind of training or information would improve your confidence and capacity to deliver these interventions?
5. What is your suggestion on how feedback from PHC workers and patients can be integrated into the ongoing implementation of these interventions? What mechanisms would you recommend for collecting and acting on this feedback?

# **Webannex V: Determinants of NCD knowledge and practices**

**Supplementary Table 7: NCD knowledge and practices and associated determinants on the post-test questionnaire**

| **Questions** | **Before training (TP1)**  **(n/24)** | **After training (TP2)**  **(n/24)** | **Three months-follow up (TP3)**  **(n/24)** | **McNemar’s χ2 test (p-value)**  **(TP1 vs. TP2)** | **McNemar’s χ2 test (p-value)**  **(TP2 vs. TP3)** | **McNemar’s χ2 test (p-value)**  **(TP1 vs. TP3)** |
| --- | --- | --- | --- | --- | --- | --- |
| **Knowledge Questions on NCD Management** | | | | | | |
| What proportion of Kenyan adults are affected by hypertension? | 29.2% | 100.0% | 79.2% | 9.32 (**0.002**) | 0.58 (0.446) | 5.54 (**0.019**) |
| Which is not considered a shared risk factor between diabetes and hypertension? | 75.0% | 83.3% | 79.2% | 0.11 (0.746) | 0.03 (0.873) | 0.03 (0.869) |
| Which of these medications is considered a first-line treatment for hypertension, according to Kenyan guidelines? | 41.7% | 100.0% | 91.7% | 5.76 (**0.016**) | 0.09 (0.768) | 4.50 (**0.034**) |
| What is a common misconception about managing diabetes? | 41.7% | 54.2% | 58.3% | 0.39 (0.532) | 0.04 (0.847) | 0.67 (0.414) |
| True or False: People with hypertension should avoid all physical activity to prevent overworking the heart* | 95.8% | 100.0% | 100.0% | 0.02 (0.884) | NA | 0.02 (0.884) |
| True or False: Providing printed materials for diabetes and hypertension management is redundant if patients receive verbal instructions | 91.7% | 83.3% | 100.0% | 0.10 (0.758) | 0.36 (0.547) | 0.09 (0.768) |
| True or False: Conducting regular brief counseling using the 5 A’s framework (Ask, Advise, Assess, Assist, Arrange) during patient visits helps promote behavior change | 100% | 100% | 100% | NA | NA | NA |
| True or False: A patient's readiness to change their lifestyle should always be assessed before providing advice on risk factor modification | 79.2% | 95.8% | 83.3% | 0.38 (0.537) | 0.21 (0.647) | 0.03 (0.873) |
| True or False: Hypertension medications are addictive and lead to dependence over time* | 91.7% | 100.0% | 95.8% | 0.09 (0.768) | 0.02 (0.884) | 0.02 (0.882) |
| **Distractors on NCD knowledge to control for the learning effect (Only in Post-test)** | | | | | | |
| The multidisciplinary team is instrumental in emphasizing the role and importance of Nutrition in the care process and not as a less necessary part of management | NA | 87.5% | NA | NA | NA | NA |
| Type 1 Diabetes is a combined insulin resistance and relative deficiency in insulin secretion* | NA | 75.0% | NA | NA | NA | NA |
| **Practices Questions on NCD management** | | | | | | |
| In what ways is the management of non-communicable diseases (NCDs) distinct from the management of communicable diseases? | 41.7% | 70.8% | 37.5% | 1.81 (0.178) | 2.46 (0.117) | 0.05 (0.818) |
| What are effective methods to improve early detection of hypertension and diabetes? | 58.3% | 83.3% | 95.8% | 1.06 (0.304) | 0.21 (0.647) | 2.19 (0.139) |
| Which systemic improvements can enhance the management of hypertension and diabetes? | 62.5% | 100% | 70.8% | 2.08 (0.150) | 1.20 (0.274) | 0.13 (0.724) |
| How can health systems monitor improvements in NCD management? | 79.2% | 100% | 87.5% | 0.58 (0.446) | 0.20 (0.655) | 0.10 (0.752) |
| Which of these statements accurately reflects key management strategies for diabetes and hypertension? | 75.0% | 75.0% | 79.2% | NA | 0.03 (0.869) | 0.03 (0.869) |
| **Distractors on NCD practices to control for the learning effect (Only in Post-test)** | | | | | | |
| What are the key parameters that must be included in an effective NCD service delivery model? | NA | 87.5% | NA | NA | NA | NA |
| How should healthcare workers approach lifestyle counseling for NCDs? | NA | 95.8% | NA | NA | NA | NA |
| What are essential clinical interventions for managing NCDs in primary care settings? | NA | 79.2% | NA | NA | NA | NA |
| Which of the following counselling statements is not from 5 A approach counseling? | NA | 12.5% | NA | NA | NA | NA |

*Responses to this item were reverse coded

**Figure 2: Distribution of NCD knowledge and practices scores**
